# Supplementary material for: First Nations reserve expansion and land cover dynamics since Treaty Land Entitlement in the Prairie region of Saskatchewan, Canada
Source: Frontiers journal article supplement (doi:10.3389/fenvs.2025.1642641), 2025-08-06
Supplement: Presentation_1.pdf [file Presentation_1.pdf]

## Supplementary Materials

### Contents

|                                                                             |    |
|-----------------------------------------------------------------------------|----|
| <b>Section 1. The number of First Nations in Saskatchewan, Canada</b> ..... | 1  |
| <b>Section 2.</b> Details of the land cover classification.....             | 2  |
| <b>Section 3.</b> Determination of the dominant AC from CLI.....            | 5  |
| <b>Tables:</b> .....                                                        | 6  |
| <b>Figures:</b> .....                                                       | 14 |
| <b>References</b> .....                                                     | 18 |

### Section 1. The number of First Nations in Saskatchewan, Canada

Indigenous Services Canada (ISC) lists 70 First Nations in Saskatchewan (*Table S1*), each with a band number and at least one reserve in the province (Aboriginal Affairs and Northern Development Canada, 2011). However, other sources report 74 (*FSIN Executive*, 2024) or 75 (Joseph, 2023) First Nations. The five First Nations missing from the ISC dataset are:

- Big Bear
- Chakastaypasin
- Peter Chapman
- Chacachas
- Stoney Knoll (Young Chippewayan, also spelled Chipeewayan)

This study only includes data from publicly available sources, most of which come from federal government records.

## Section 2. Details of the land cover classification

### Methodology

The reference data used for the supervised image classification were derived from FlySask2, high-resolution imagery in Google Earth Pro, and the AAFC Annual Crop Inventory product, all of which were visually interpreted. To ensure temporal consistency, the selected data points were tested using the Continuous Change Detection and Classification (CCDC) algorithm, confirming no abrupt changes within the five-year windows used for image composition (Arévalo et al., 2020). 715 reference points for the Pre-Land Claims era and 723 for the Post-Land Claims era were used for supervised classification. Of these, 80% were allocated for classifier training, while the remaining 20% was reserved for accuracy validation. Figure S3 shows the land cover classification results for Pre- and Post- Land Claims periods.

Five quality metrics were explored to evaluate the accuracy of the land use classification: 1) the overall accuracy ( $OA$ ), 2) the kappa coefficient ( $K$ ), 3) the user's accuracy ( $UA$ ), 4) the producer's accuracy ( $PA$ ), and 5) the  $F$  score ( $F_1$ ) (Becker et al., 2021).

$$OA = \frac{\text{Number of correctly classified samples}}{\text{Number of all samples}} * 100\%$$

Equation 1

$$K = \frac{OA - \text{Estimated chance agreement}}{1 - \text{Estimated chance agreement}}$$

Equation 2

$$UA = \frac{\text{Number of correctly classified samples in each class}}{\text{Number of samples to that class}} * 100\%$$

Equation 3

$$PA = \frac{\text{Number of correctly classified samples in each class}}{\text{Number of samples from reference data in each class}} * 100\%$$

Equation 4

$$F_1 = \frac{2 * UA * PA}{UA + PA}$$

Equation 5

Overall Accuracy (*OA*) and Cohen's Kappa (*K*) are critical indicators for assessing land use classification accuracy. *K*, also known as Cohen's Kappa coefficient, measures inter-rater reliability for categorical items (Zhao et al., 2024). User's Accuracy (*UA*) indicates the probability that a pixel was correctly classified within a given class. At the same time, the Producer's Accuracy (*PA*) reflects the likelihood that a pixel classified in a given map class represents that class on the ground. The *F*<sub>1</sub>-score, the harmonic mean of Producer's and User's accuracies, evaluates accuracy at the class level (Nasiri et al., 2022). These metrics were assessed to ensure the land use map generated before the Land Claims period was accurate enough to explore land use diversity within and outside the First Nations Reserves.

## Results

The land cover classification accuracy assessment was conducted for both the Pre-Land Claims (1988–1992) and Post-Land Claims (2020–2024) periods to evaluate classification performance (Table S4 and Table S5). The overall accuracy (*OA*) reached 86.9% for the Pre-Land Claims classification, with a Cohen's Kappa coefficient of 81.7%, indicating substantial agreement. The *F*<sub>1</sub>-scores varied across different land cover types, with cropland achieving the highest accuracy (92.7%) and grassland showing lower accuracy (77.4%). The *UA* and *PA* metrics similarly reflected high classification reliability for most land cover categories (Table S4). For the Post-Land Claims classification, the *OA* was slightly lower at 85.5%, with a Cohen's Kappa of 81.5%.

The cropland category maintained high classification performance (92.0% F1-score), while grassland and wetland exhibited relatively lower accuracy (76.9% and 72.0% F1-scores, respectively). The decrease in classification accuracy for specific land cover types may be attributed to increased landscape heterogeneity in the Post-Land Claims period (Table S5).

### Section 3. Determination of the dominant AC from CLI

The corresponding percentages were used to calculate the dominant soil agricultural capability AC for polygons containing multiple classes in the AC rating.

$$AC = \begin{cases} \sum_{i=A}^D Class_i * Percent_i, & \text{(if any class labeled as 'Organic Soils' has the Percent} < 50\%) \\ 0, & \text{(if any class labeled as 'Organic Soils' has the Percent} \geq 50\%) \end{cases}$$

Equation 6

A 50% threshold was applied to each polygon in the Canada Land Inventory (CLI) product to filter out fields with a higher percentage of organic soil. For polygons with less than 50% Organic soil composition, Equation 6 was used to calculate the AC score. Subsequently, the CLI product and the land use map were overlaid to conduct zonal statistics, analyzing AC under different land covers (*Figure S2*).

**Tables:**

**Table S1** List of all the First Nations provided by the ISC (70); the 58 Nations within the study region are in ***bold Italics***.

| Count            | Band NO.          | Band Name                                    | Main Reserve                       | Treaty          | Tribal Council                                     |
|------------------|-------------------|----------------------------------------------|------------------------------------|-----------------|----------------------------------------------------|
| <i><b>1</b></i>  | <i><b>406</b></i> | <i><b>Ahtahkakoop Cree Nation</b></i>        | <i><b>Ahtahkakoop 104</b></i>      | <i><b>6</b></i> | <i><b>Battlefords Agency Tribal Chiefs</b></i>     |
| <i><b>2</b></i>  | <i><b>369</b></i> | <i><b>Beardy's and Okemasis</b></i>          | <i><b>Beardy's 96 &amp; 97</b></i> | <i><b>6</b></i> | <i><b>Independent</b></i>                          |
| <i><b>3</b></i>  | <i><b>399</b></i> | <i><b>Big Island Lake Cree Nation</b></i>    | <i><b>Big Island Lake 124</b></i>  | <i><b>6</b></i> | <i><b>Meadow Lake Tribal Council</b></i>           |
| <i><b>4</b></i>  | <i><b>404</b></i> | <i><b>Big River First Nation</b></i>         | <i><b>Big River 118A</b></i>       | <i><b>6</b></i> | <i><b>Agency Chiefs Tribal Council</b></i>         |
| 5                | 403               | Birch Narrows First Nation                   | Churchill Lake 193A                | 10              | Meadow Lake Tribal Council                         |
| 6                | 359               | Black Lake Denesuline Nation                 | Black Lake 221                     | 8/10            | Prince Albert Grand Council                        |
| 7                | 398               | Buffalo River Dene Nation                    | Buffalo River Dene 193             | 10              | Meadow Lake Tribal Council                         |
| 8                | 394               | Canoe Lake Cree First Nation                 | Canoe Lake 165                     | 10              | Meadow Lake Tribal Council                         |
| <i><b>9</b></i>  | <i><b>378</b></i> | <i><b>Carry The Kettle Nakoda Nation</b></i> | <i><b>Carry The Kettle 76</b></i>  | <i><b>4</b></i> | <i><b>File Hills Qu'Appelle Tribal Council</b></i> |
| 10               | 401               | Clearwater River Dene Nation                 | Clearwater River 222               | 8               | Meadow Lake Tribal Council                         |
| <i><b>11</b></i> | <i><b>366</b></i> | <i><b>Cote First Nation</b></i>              | <i><b>Cote 366</b></i>             | <i><b>4</b></i> | <i><b>Yorkton Tribal Council</b></i>               |
| <i><b>12</b></i> | <i><b>361</b></i> | <i><b>Cowessess First Nation</b></i>         | <i><b>Cowessess 73</b></i>         | <i><b>4</b></i> | <i><b>File Hills Qu'Appelle Tribal Council</b></i> |
| 13               | 350               | Cumberland House Cree Nation                 | Cumberland House 20                | 5               | Prince Albert Grand Council                        |
| <i><b>14</b></i> | <i><b>389</b></i> | <i><b>Day Star First Nation</b></i>          | <i><b>Day Star 87</b></i>          | <i><b>4</b></i> | <i><b>File Hills Qu'Appelle Tribal Council</b></i> |
| 15               | 400               | English River First Nation                   | La Plonge 192                      | 10              | Prince Albert Grand Council                        |
| <i><b>16</b></i> | <i><b>390</b></i> | <i><b>Fishing Lake First Nation</b></i>      | <i><b>Fishing Lake 89A</b></i>     | <i><b>4</b></i> | <i><b>Yorkton Tribal Council</b></i>               |
| <i><b>17</b></i> | <i><b>395</b></i> | <i><b>Flying Dust First Nation</b></i>       | <i><b>Flying Dust 105</b></i>      | <i><b>6</b></i> | <i><b>Meadow Lake Tribal Council</b></i>           |
| 18               | 351               | Fond du Lac Denesuline Nation                | Fond du Lac 227                    | 8               | Prince Albert Grand Council                        |
| <i><b>19</b></i> | <i><b>391</b></i> | <i><b>George Gordon First Nation</b></i>     | <i><b>George Gordon 86</b></i>     | <i><b>4</b></i> | <i><b>File Hills Qu'Appelle Tribal Council</b></i> |
| 20               | 352               | Hatchet Lake Denesuline Nation               | Hatchet Lake 183                   | 10              | Prince Albert Grand Council                        |
| <i><b>21</b></i> | <i><b>370</b></i> | <i><b>James Smith Cree Nation</b></i>        | <i><b>James Smith 100</b></i>      | <i><b>6</b></i> | <i><b>Prince Albert Grand Council</b></i>          |
| <i><b>22</b></i> | <i><b>362</b></i> | <i><b>Kahkewistahaw First Nation</b></i>     | <i><b>Kahkewistahaw 72</b></i>     | <i><b>4</b></i> | <i><b>Yorkton Tribal Council</b></i>               |

| Count | Band NO. | Band Name                                      | Main Reserve                 | Treaty | Tribal Council                              |
|-------|----------|------------------------------------------------|------------------------------|--------|---------------------------------------------|
| 23    | 393      | <i>Kawacatoose First Nation</i>                | <i>Kawacatoose 88</i>        | 4      | <i>Touchwood Agency Tribal Council</i>      |
| 24    | 367      | <i>Keeseekoose First Nation</i>                | <i>Keeseekoose 66</i>        | 4      | <i>Yorkton Tribal Council</i>               |
| 25    | 377      | <i>Kinistin Saulteaux Nation</i>               | <i>Kinistin 91</i>           | 4      | <i>Saskatoon Tribal Council</i>             |
| 26    | 353      | <i>Lac La Ronge Indian Band</i>                | <i>Lac La Ronge 156</i>      | 6      | <i>Prince Albert Grand Council</i>          |
| 27    | 379      | <i>Little Black Bear First Nation</i>          | <i>Little Black Bear 84</i>  | 4      | <i>File Hills Qu'Appelle Tribal Council</i> |
| 28    | 340      | <i>Little Pine First Nation</i>                | <i>Little Pine 116</i>       | 6      | <i>Battlefords Tribal Council</i>           |
| 29    | 341      | <i>Lucky Man Cree Nation</i>                   | <i>Lucky Man 72</i>          | 6      | <i>Battlefords Tribal Council</i>           |
| 30    | 396      | <i>Makwa Sahgaiehcan First Nation</i>          | <i>Makwa Sahgaiehcan 129</i> | 6      | <i>Meadow Lake Tribal Council</i>           |
| 31    | 397      | <i>Ministikwan Lake Cree Nation</i>            | <i>Ministikwan 161</i>       | 6      | <i>Meadow Lake Tribal Council</i>           |
| 32    | 374      | <i>Mistawasis Nêhiyawak</i>                    | <i>Mistawasis 103</i>        | 6      | <i>Saskatoon Tribal Council</i>             |
| 33    | 354      | Montreal Lake Cree Nation                      | Montreal Lake 106            | 6      | Prince Albert Grand Council                 |
| 34    | 342      | <i>Moosomin First Nation</i>                   | <i>Moosomin 112B</i>         | 6      | <i>Battlefords Tribal Council</i>           |
| 35    | 343      | <i>Mosquito, Grizzly Bear's Head, Lean Man</i> | <i>Mosquito 109</i>          | 6      | <i>Battlefords Tribal Council</i>           |
| 36    | 381      | <i>Muscowpetung Saulteaux Nation</i>           | <i>Muscowpetung 80</i>       | 4      | <i>File Hills Qu'Appelle Tribal Council</i> |
| 37    | 375      | <i>Muskeg Lake Cree Nation</i>                 | <i>Muskeg Lake 102</i>       | 6      | <i>Saskatoon Tribal Council</i>             |
| 38    | 371      | <i>Muskoday First Nation</i>                   | <i>Muskoday 99</i>           | 6      | <i>Saskatoon Tribal Council</i>             |
| 39    | 392      | <i>Muskowekwan First Nation</i>                | <i>Muskowekwan 85</i>        | 4      | <i>Touchwood Agency Tribal Council</i>      |
| 40    | 380      | <i>Nekaneet First Nation</i>                   | <i>Nekaneet 160A</i>         | 4      | <i>Independent</i>                          |
| 41    | 408      | <i>Ocean Man First Nation</i>                  | <i>Ocean Man 69</i>          | 4      | <i>File Hills Qu'Appelle Tribal Council</i> |
| 42    | 363      | <i>Ochapowace Nation</i>                       | <i>Ochapowace 71</i>         | 4      | <i>File Hills Qu'Appelle Tribal Council</i> |
| 43    | 382      | <i>Okanese First Nation</i>                    | <i>Okanese 82</i>            | 4      | <i>File Hills Qu'Appelle Tribal Council</i> |
| 44    | 373      | <i>One Arrow First Nation</i>                  | <i>One Arrow 95</i>          | 6      | <i>Saskatoon Tribal Council</i>             |
| 45    | 344      | <i>Onion Lake Cree Nation</i>                  | <i>Onion Lake 119-1</i>      | 6      | <i>Independent</i>                          |
| 46    | 383      | <i>Pasqua First Nation</i>                     | <i>Pasqua 79</i>             | 4      | <i>File Hills Qu'Appelle Tribal Council</i> |
| 47    | 384      | <i>Peepeekisis Cree Nation</i>                 | <i>Peepeekisis 81</i>        | 4      | <i>File Hills Qu'Appelle Tribal Council</i> |
| 48    | 405      | <i>Pelican Lake First Nation</i>               | <i>Pelican Lake 191</i>      | 6      | <i>Agency Chiefs Tribal Council</i>         |

| Count | Band NO. | Band Name                             | Main Reserve               | Treaty | Tribal Council                                     |
|-------|----------|---------------------------------------|----------------------------|--------|----------------------------------------------------|
| 49    | 355      | Peter Ballantyne Cree Nation          | Amiskosakahikan 210        | 6/10   | Prince Albert Grand Council                        |
| 50    | 409      | <i>Pheasant Rump Nakota Nation</i>    | <i>Pheasant Rump 68</i>    | 4      | <i>Independent</i>                                 |
| 51    | 385      | <i>Piapot First Nation</i>            | <i>Piapot 75</i>           | 4      | <i>File Hills Qu'Appelle Tribal Council</i>        |
| 52    | 345      | <i>Poundmaker Cree Nation</i>         | <i>Poundmaker 114</i>      | 6      | <i>Battlefords Tribal Council</i>                  |
| 53    | 356      | <i>Red Earth Cree Nation</i>          | <i>Red Earth 29</i>        | 5      | <i>Prince Albert Grand Council</i>                 |
| 54    | 346      | <i>Red Pheasant First Nation</i>      | <i>Red Pheasant 108</i>    | 6      | <i>Battlefords Tribal Council</i>                  |
| 55    | 347      | <i>Saulteaux First Nation</i>         | <i>Saulteaux 159</i>       | 6      | <i>Battlefords Tribal Council</i>                  |
| 56    | 357      | <i>Shoal Lake Cree Nation</i>         | <i>Shoal Lake 28A</i>      | 5      | <i>Prince Albert Grand Council</i>                 |
| 57    | 386      | <i>Standing Buffalo Dakota Nation</i> | <i>Standing Buffalo 78</i> | 4      | <i>File Hills Qu'Appelle Tribal Council</i>        |
| 58    | 387      | <i>Star Blanket Cree Nation</i>       | <i>Star Blanket 83</i>     | 4      | <i>File Hills Qu'Appelle Tribal Council</i>        |
| 59    | 360      | <i>Sturgeon Lake First Nation</i>     | <i>Sturgeon Lake 154</i>   | 6      | <i>Prince Albert Grand Council</i>                 |
| 60    | 348      | <i>Sweetgrass First Nation</i>        | <i>Sweetgrass 113</i>      | 6      | <i>Battlefords Tribal Council</i>                  |
| 61    | 368      | <i>The Key First Nation</i>           | <i>The Key 65</i>          | 4      | <i>Yorkton Tribal Council</i>                      |
| 62    | 349      | <i>Thunderchild First Nation</i>      | <i>Thunderchild 115B</i>   | 6      | <i>Battlefords Tribal Council</i>                  |
| 63    | 358      | <i>Wahpeton Dakota Nation</i>         | <i>Wahpeton 94A</i>        | 6      | <i>Prince Albert Grand Council (non-signatory)</i> |
| 64    | 402      | <i>Waterhen Lake First Nation</i>     | <i>Waterhen Lake 130</i>   | 6      | <i>Meadow Lake Tribal Council</i>                  |
| 65    | 365      | <i>White Bear First Nations</i>       | <i>White Bear 70</i>       | 4      | <i>File Hills Qu'Appelle Tribal Council</i>        |
| 66    | 372      | <i>Whitecap Dakota First Nation</i>   | <i>Whitecap 94</i>         | 6      | <i>Saskatoon Tribal Council</i>                    |
| 67    | 407      | <i>Witchehan Lake First Nation</i>    | <i>Witchehan Lake 117</i>  | 6      | <i>Battlefords Tribal Council</i>                  |
| 68    | 388      | <i>Wood Mountain First Nation</i>     | <i>Wood Mountain 160</i>   | 4      | <i>Independent</i>                                 |
| 69    | 376      | <i>Yellow Quill First Nation</i>      | <i>Yellowquill 90</i>      | 4      | <i>Saskatoon Tribal Council</i>                    |
| 70    | 364      | <i>Zagime Anishinabek</i>             | <i>Sakimay 74</i>          | 4      | <i>File Hills Qu'Appelle Tribal Council</i>        |



**Table S2** Ecoregional Characteristics of the 58 First Nation Reserves in the study region.

| <b>Ecoregion Name</b> | <b>Number of First Nations</b> | <b>Area (km<sup>2</sup>)</b> | <b>Mean annual temperature (°C)</b> | <b>Mean annual precipitation (mm)</b> | <b>Dominant soil type</b>         | <b>Natural vegetative cover</b>                                                                                    |
|-----------------------|--------------------------------|------------------------------|-------------------------------------|---------------------------------------|-----------------------------------|--------------------------------------------------------------------------------------------------------------------|
| Aspen Parkland        | 29                             | 8.17*10 <sup>4</sup>         | 1.5                                 | 400-500                               | Black Chernozem, Gleysol          | Trembling aspen, oak, mixed tall shrubs, intermittent fescue grasslands                                            |
| Boreal Transition     | 21                             | 5.41*10 <sup>4</sup>         | 1.0                                 | 450-550                               | Gray Luvisol, Dark Gray Chernozem | Deciduous forest and farmland                                                                                      |
| Cypress Upland        | 1                              | 4.86*10 <sup>3</sup>         | 3                                   | 325-450                               | Chernozemic Black and Dark Brown  | fescue and wheatgrass grasslands, mixed montane-type open forest and shrub                                         |
| Mid_Boreal Lowland    | 2                              | 2.15*10 <sup>4</sup>         | -1                                  | 375-625                               | Eutric Brunisols and Mesisols     | Tamarack, balsam fir, and black spruce                                                                             |
| Mid_Boreal Uplands    | 3                              | 6.78*10 <sup>3</sup>         | 0                                   | 100-550                               | Gray Luvisol                      | Mixed coniferous and deciduous forest                                                                              |
| Mixed Grassland       | 1                              | 8.64*10 <sup>4</sup>         | 2.5                                 | 250-350                               | Brown Chernozem, Solonetz         | Spear grass, blue grama grass, wheat grass                                                                         |
| Moist Mixed Grassland | 1                              | 6.78*10 <sup>4</sup>         | 2.5                                 | 350-400                               | Dark Brown Chernozem, Solonetz    | Spear grass, wheat grass, and deciduous shrubs, including buckbrush, chokecherry, wolf willow, and Saskatoon berry |

**Table S3** Land capability classification for agriculture classes.

| <b>AC Class</b> | <b>Description</b>                                                                                                                                           | <b>Category</b>                                             |
|-----------------|--------------------------------------------------------------------------------------------------------------------------------------------------------------|-------------------------------------------------------------|
| <b>1</b>        | Soils in this class have no significant limitations when used for crops.                                                                                     | <b>Prime or high-quality</b>                                |
| <b>2</b>        | Soils in this class have moderate limitations that restrict the range of crops or require moderate conservation practices.                                   |                                                             |
| <b>3</b>        | Soils in this class have moderately severe limitations that restrict the range of crops or require particular conservation practices.                        | <b>Marginal, or less suitable for agriculture</b>           |
| <b>4</b>        | Soils in this class have severe limitations that restrict the range of crops or require particular conservation practices.                                   |                                                             |
| <b>5</b>        | Soils in this class had very severe limitations that restricted their capability to produce perennial forage crops, and improvement practices were feasible. | <b>Limited capacity for cropland, only for forage crops</b> |
| <b>6</b>        | Soils in this class can only produce perennial forage crops, and improvement practices are not feasible.                                                     |                                                             |
| <b>7</b>        | Soils in this class have no capacity for arable culture or permanent pasture.                                                                                | <b>Unsuitable for Farming</b>                               |
| <b>8</b>        |                                                                                                                                                              | Unclassified (UN)                                           |
| <b>O</b>        | Organic Soils (not placed in capability classes).                                                                                                            | <b>O</b>                                                    |

**Table S4** Accuracy assessment matrix for the land cover classification of the Pre-Land Claims era (1989-1992 composition)

| Validation Data        |                      |            |          |           |           |           |          |            |            |        |
|------------------------|----------------------|------------|----------|-----------|-----------|-----------|----------|------------|------------|--------|
| Classification Results | Class                | Settlement | Water    | Forest    | Cropland  | Grassland | Wetland  | Other Land | Total      | UA     |
|                        | Settlement           | <b>8</b>   | 0        | 0         | 0         | 0         | 0        | 1          | 9          | 88.9%  |
|                        | Water                | 0          | <b>9</b> | 0         | 0         | 0         | 1        | 0          | 10         | 90.0%  |
|                        | Forest               | 0          | 1        | <b>18</b> | 2         | 1         | 0        | 0          | 22         | 81.9%  |
|                        | Cropland             | 1          | 0        | 1         | <b>63</b> | 3         | 0        | 0          | 68         | 92.7%  |
|                        | Grassland            | 0          | 0        | 2         | 2         | <b>15</b> | 1        | 0          | 20         | 75.0%  |
|                        | Wetland              | 0          | 2        | 0         | 1         | 0         | <b>9</b> | 0          | 12         | 75.0%  |
|                        | Other Land           | 0          | 0        | 0         | 0         | 0         | 0        | <b>3</b>   | 3          | 100.0% |
|                        | <b>Total</b>         | 9          | 12       | 21        | 68        | 19        | 11       | 4          | <b>144</b> |        |
|                        | <b>PA</b>            | 88.9%      | 75.0%    | 85.8%     | 92.7%     | 79.9%     | 81.7%    | 75%        |            |        |
|                        | <b>OA</b>            | 86.9%      |          |           |           |           |          |            |            |        |
|                        | <b>F<sub>1</sub></b> | 88.9%      | 81.8%    | 83.8%     | 92.7%     | 77.4%     | 78.2%    | 85.7%      |            |        |
|                        | <b>K</b>             | 81.7%      |          |           |           |           |          |            |            |        |

**Table S5** Accuracy assessment matrix for the land cover classification of the Post-Land Claims era (2019-2023 composition)

| Validation Data        |                      |            |          |           |           |           |          |            |            |        |
|------------------------|----------------------|------------|----------|-----------|-----------|-----------|----------|------------|------------|--------|
| Classification Results | Class                | Settlement | Water    | Forest    | Cropland  | Grassland | Wetland  | Other Land | Total      | UA     |
|                        | Settlement           | <b>8</b>   | 0        | 0         | 0         | 0         | 0        | 1          | 9          | 88.9%  |
|                        | Water                | 0          | <b>9</b> | 0         | 0         | 0         | 1        | 0          | 10         | 90.0%  |
|                        | Forest               | 1          | 1        | <b>17</b> | 1         | 1         | 1        | 0          | 22         | 77.3%  |
|                        | Cropland             | 1          | 0        | 1         | <b>63</b> | 2         | 1        | 0          | 68         | 91.7%  |
|                        | Grassland            | 1          | 0        | 1         | 3         | <b>15</b> | 1        | 0          | 21         | 71.4%  |
|                        | Wetland              | 0          | 1        | 1         | 1         | 0         | <b>9</b> | 0          | 12         | 75.0%  |
|                        | Other Land           | 0          | 0        | 0         | 0         | 0         | 0        | <b>3</b>   | 3          | 100.0% |
|                        | <b>Total</b>         | 11         | 11       | 20        | 68        | 18        | 13       | 4          | <b>145</b> |        |
|                        | <b>PA</b>            | 72.7%      | 81.8%    | 85.0%     | 92.7%     | 83.3%     | 69.2%    | 75.0%      |            |        |
|                        | <b>OA</b>            | 85.5%      |          |           |           |           |          |            |            |        |
|                        | <b>F<sub>1</sub></b> | 80.0%      | 85.7%    | 81.1%     | 92.0%     | 76.9%     | 72.0%    | 85.7%      |            |        |
|                        | <b>K</b>             | 81.5%      |          |           |           |           |          |            |            |        |

**Table S6** The land cover change matrix of the original Reserves between 1992 and 2024.

| Original Reserves          |                      | Pre-Land Claims (1992) |       |        |          |           |         |        | Subtotal |
|----------------------------|----------------------|------------------------|-------|--------|----------|-----------|---------|--------|----------|
| Post-Land Claims<br>(2024) | Land cover types (%) | Settlement             | Water | Forest | Cropland | Grassland | Wetland | Others |          |
|                            | Settlement           | 0.53                   | 0.01  | 0.01   | 0.02     | 0.01      | 0.02    | 0.00   | 0.60     |
|                            | Water                | 0.08                   | 2.28  | 0.01   | 0.09     | 0.12      | 0.36    | 0.01   | 2.95     |
|                            | Forest               | 0.12                   | 0.55  | 31.85  | 7.78     | 0.79      | 1.01    | 0.00   | 42.10    |
|                            | Cropland             | 0.87                   | 0.21  | 0.22   | 27.28    | 1.07      | 0.54    | 0.00   | 30.19    |
|                            | Grassland            | 0.92                   | 0.02  | 2.43   | 2.27     | 8.54      | 1.08    | 0.00   | 15.26    |
|                            | Wetland              | 0.00                   | 0.40  | 3.10   | 0.30     | 0.02      | 5.08    | 0.00   | 8.90     |
|                            | Others               | 0.01                   | 0.00  | 0.00   | 0.00     | 0.00      | 0.00    | 0.00   | 0.01     |
|                            | Subtotal             | 2.53                   | 3.47  | 37.62  | 37.74    | 10.55     | 8.09    | 0.01   |          |

**Table S7** The land cover change matrix of the Additions between 1992 and 2024

| Additions                  |                      | Pre-Land Claims (1992) |       |        |          |           |         |        | Subtotal |
|----------------------------|----------------------|------------------------|-------|--------|----------|-----------|---------|--------|----------|
| Post-Land Claims<br>(2024) | Land cover types (%) | Settlement             | Water | Forest | Cropland | Grassland | Wetland | Others |          |
|                            | Settlement           | 1.14                   | 0.01  | 0.00   | 0.00     | 0.01      | 0.00    | 0.00   | 1.16     |
|                            | Water                | 0.01                   | 2.69  | 0.02   | 0.03     | 0.12      | 0.08    | 0.01   | 2.96     |
|                            | Forest               | 0.01                   | 1.61  | 22.73  | 8.42     | 0.82      | 0.36    | 0.00   | 33.95    |
|                            | Cropland             | 0.09                   | 0.14  | 0.08   | 34.68    | 0.26      | 1.85    | 0.00   | 37.10    |
|                            | Grassland            | 0.06                   | 0.51  | 0.58   | 4.07     | 10.09     | 4.28    | 0.00   | 19.59    |
|                            | Wetland              | 0.05                   | 0.33  | 0.08   | 0.28     | 0.02      | 4.50    | 0.00   | 5.24     |
|                            | Others               | 0.00                   | 0.00  | 0.00   | 0.00     | 0.00      | 0.00    | 0.00   | 0.00     |
|                            | Subtotal             | 1.36                   | 5.29  | 23.49  | 47.48    | 11.32     | 11.06   | 0.01   |          |

**Table S8** Percentage of land cover types across soil agricultural capability scores (AC) in original Reserves (2024 Land Cover Classification).

| Original<br>Reserves | Land Cover Type |       |        |          |           |         |        |
|----------------------|-----------------|-------|--------|----------|-----------|---------|--------|
|                      | Settlement      | Water | Forest | Cropland | Grassland | Wetland | Others |
| AC (%)               |                 |       |        |          |           |         |        |
| <b>1</b>             | 1.92            | 1.29  | 7.10   | 83.91    | 0.80      | 4.99    | 0.00   |
| <b>2</b>             | 2.23            | 3.14  | 15.31  | 71.66    | 2.47      | 5.19    | 0.00   |
| <b>3</b>             | 1.94            | 3.74  | 25.28  | 48.06    | 6.08      | 14.90   | 0.00   |
| <b>4</b>             | 2.18            | 7.71  | 43.38  | 29.08    | 5.46      | 12.18   | 0.01   |
| <b>5</b>             | 2.29            | 9.52  | 49.57  | 15.74    | 11.69     | 11.18   | 0.01   |
| <b>6</b>             | 1.62            | 3.14  | 46.89  | 21.36    | 13.44     | 13.53   | 0.02   |
| <b>7</b>             | 1.16            | 37.67 | 28.76  | 8.99     | 3.74      | 19.68   | 0.00   |
| <b>8</b>             | 0.01            | 0.13  | 92.96  | 0.00     | 0.00      | 6.90    | 0.00   |
| <b>O</b>             | 1.00            | 13.87 | 67.12  | 5.75     | 1.52      | 10.72   | 0.01   |

**Table S9** Percentage of land cover types across soil agricultural capability scores (AC) in Additions of the Reserves (2024 Land Cover Classification).

| Additions | Land Cover Type |       |        |          |           |         |        |
|-----------|-----------------|-------|--------|----------|-----------|---------|--------|
|           | Settlement      | Water | Forest | Cropland | Grassland | Wetland | Others |
| AC (%)    |                 |       |        |          |           |         |        |
| <b>1</b>  | 1.73            | 1.16  | 2.72   | 90.89    | 0.60      | 2.90    | 0.00   |
| <b>2</b>  | 1.85            | 2.30  | 9.66   | 80.61    | 2.49      | 3.08    | 0.00   |
| <b>3</b>  | 1.43            | 2.98  | 11.66  | 76.84    | 1.34      | 5.75    | 0.00   |
| <b>4</b>  | 1.21            | 2.71  | 34.28  | 52.16    | 4.15      | 5.49    | 0.00   |
| <b>5</b>  | 1.08            | 5.23  | 30.24  | 28.84    | 26.09     | 8.52    | 0.01   |
| <b>6</b>  | 1.64            | 1.78  | 37.87  | 23.45    | 28.40     | 6.83    | 0.02   |
| <b>7</b>  | 1.29            | 23.26 | 20.23  | 5.19     | 22.98     | 17.57   | 9.48   |
| <b>8</b>  | 1.10            | 0.46  | 92.20  | 0.27     | 0.03      | 5.93    | 0.01   |
| <b>O</b>  | 0.88            | 4.86  | 78.47  | 2.58     | 1.30      | 11.81   | 0.10   |

**Figures:**

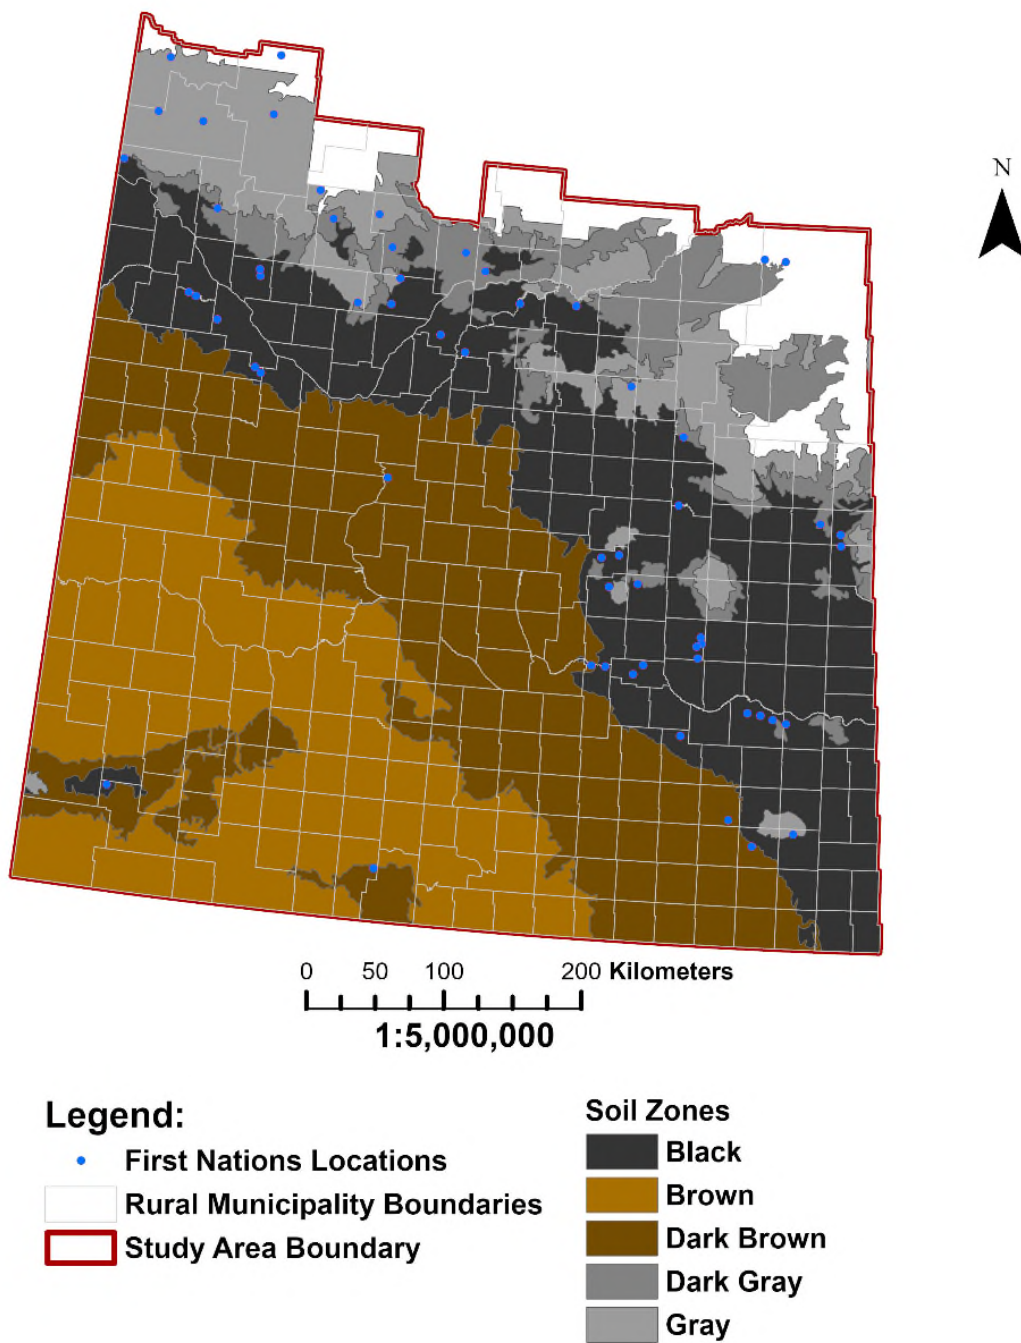

**Figure S1** Soil Zones of Southern Saskatchewan in Relation to 58 First Nation Reserves Locations.

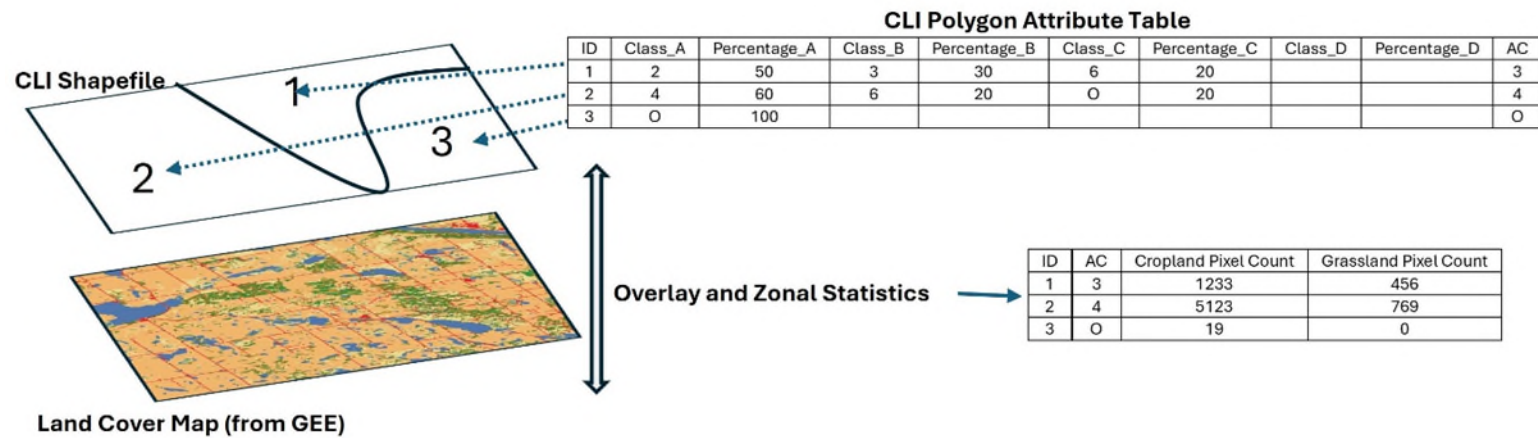

**Figure S2** Illustration of the workflow for determining the dominant agricultural capability score for each CLI polygon (i.e., soil map unit) from the CLI product with the Land Cover Map.



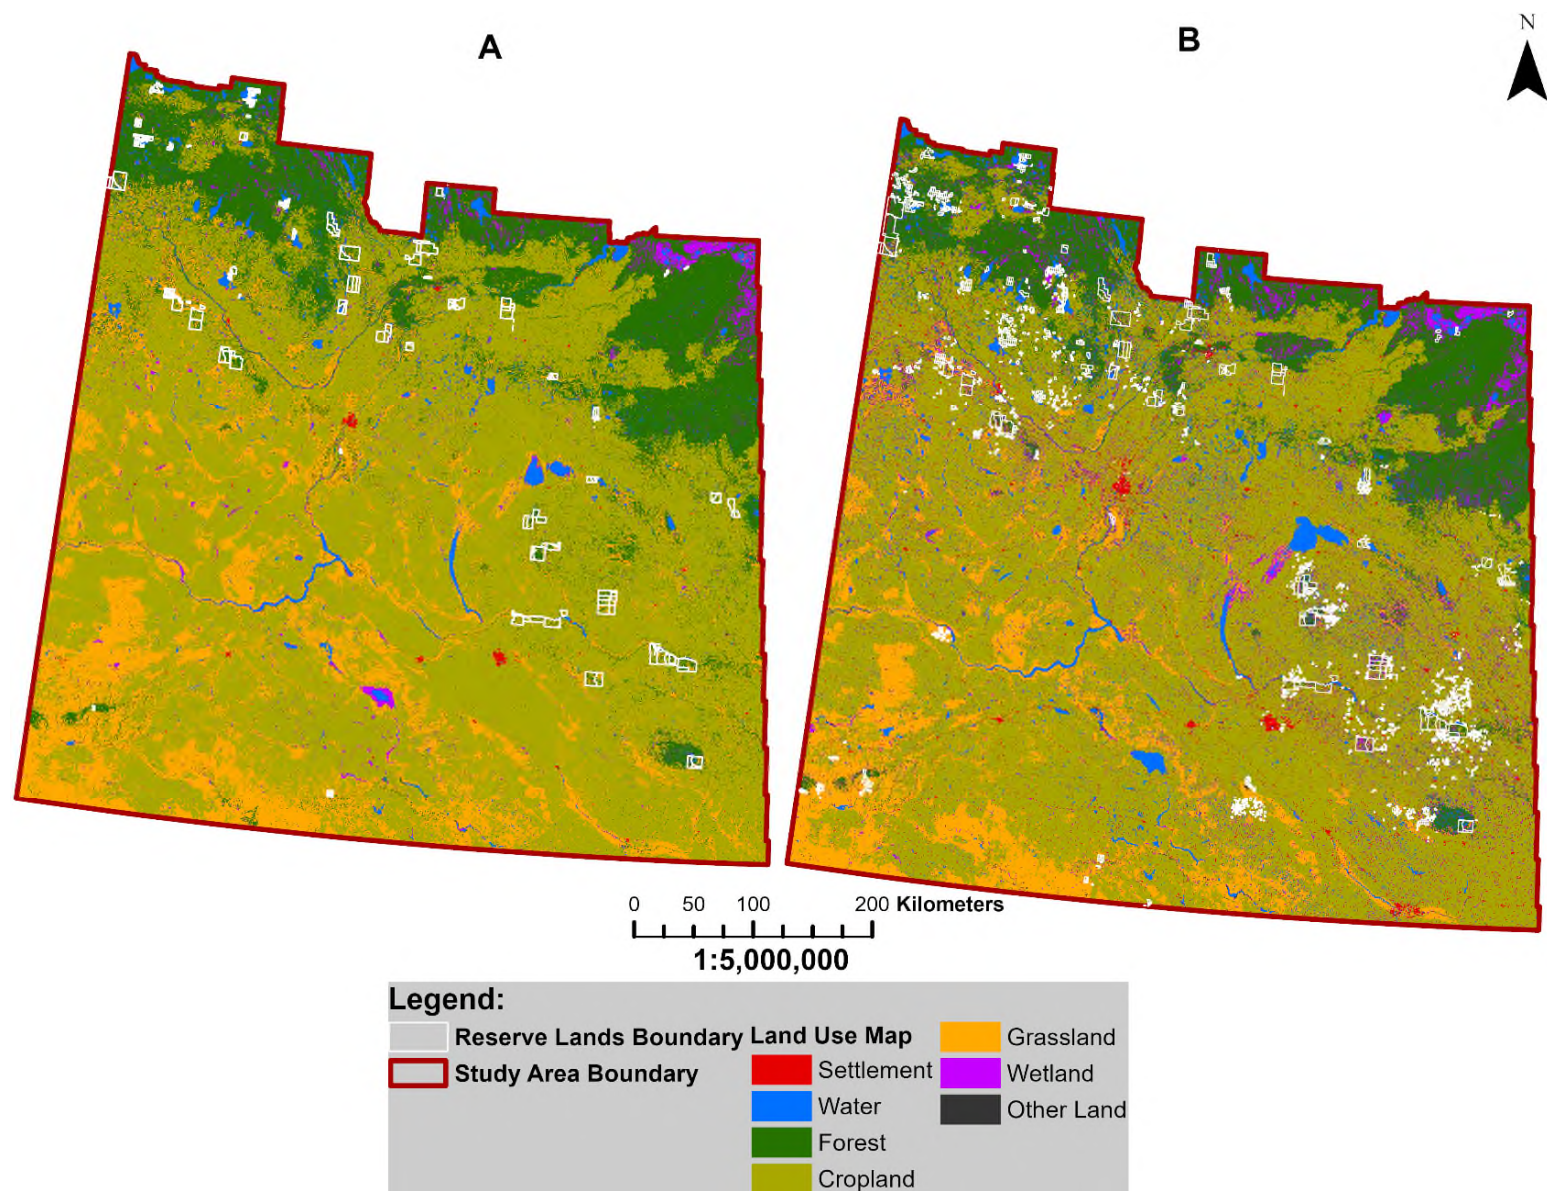

**Figure S3** Land cover classification in the agricultural zone of Saskatchewan (A) Pre- and (B) Post-Land Claims.



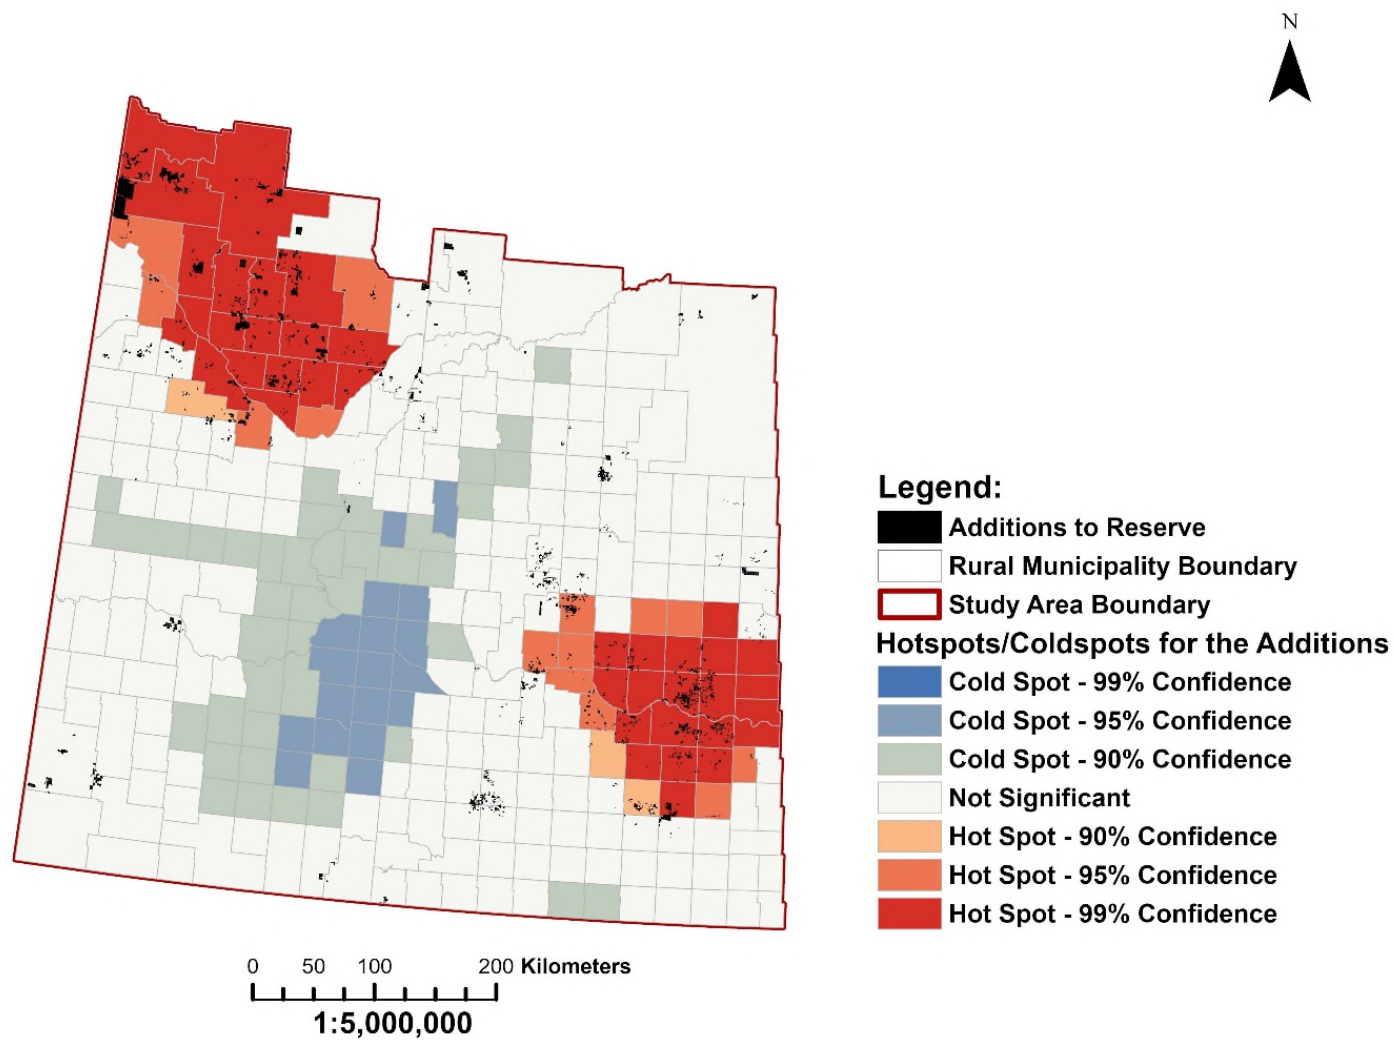

**Figure S4** Hotspot analysis of the new reserve additions using the Getis-Ord  $G_i^*$  statistic.

## References

- Aboriginal Affairs and Northern Development Canada. (2011). *List of First Nations*. Available at: <https://fnp-ppn.aadnc-aandc.gc.ca/fnp/Main/Search/SearchFN.aspx?lang=eng> (Accessed June 1, 2024).
- Arévalo, P., Bullock, E. L., Woodcock, C. E., & Olofsson, P. (2020). A suite of tools for continuous land change monitoring in google earth engine. *Frontiers in Climate*, 2, 576740.
- Becker, W. R., Ló, T. B., Johann, J. A., & Mercante, E. (2021). Statistical features for land use and land cover classification in Google Earth Engine. *Remote Sensing Applications: Society and Environment*, 21, 100459. <https://doi.org/https://doi.org/10.1016/j.rsase.2020.100459>
- FSIN Executive. (2024). Available at: <https://www.fsin.ca/executive/> (Accessed June 3, 2024).
- Joseph, B. (2023). *First Nations in Saskatchewan*. The Canadian Encyclopedia. <https://www.thecanadianencyclopedia.ca/en/article/first-nations-in-saskatchewan>
- Nasiri, V., Deljouei, A., Moradi, F., Sadeghi, S. M., & Borz, S. A. (2022). Land Use and Land Cover Mapping Using Sentinel-2, Landsat-8 Satellite Images, and Google Earth Engine: A Comparison of Two Composition Methods. *Remote Sensing* (Vol. 14, Issue 9). <https://doi.org/10.3390/rs14091977>
- Zhao, Z., Islam, F., Waseem, L. A., Tariq, A., Nawaz, M., Islam, I. U., Bibi, T., Rehman, N. U., Ahmad, W., & Aslam, R. W. (2024). Comparison of three machine learning algorithms using google earth engine for land use land cover classification. *Rangeland Ecology & Management*, 92, 129–137.
